# Supplementary material for: Quality assessment of the MRI-radiomics studies for MGMT promoter methylation prediction in glioma: a systematic review and meta-analysis
Source: PubMed Central journal article supplement (PMC11364578; doi:10.1007/s00330-024-10594-x), 2024-02-03
Supplement: 330_2024_10594_MOESM1_ESM.pdf [file 330_2024_10594_MOESM1_ESM.pdf]

## Supplementary materials

### Supplementary Methods

Two reviewers (F.M.D. and R.P.) assessed whether the following four domains of QUADAS-2 could have introduced bias in the included studies: (1) patient selection — description of how patients were recruited (use of consecutive/random sample, avoidance of case-control design, appropriate exclusion criteria); (2) index test — how the index test (i.e., radiomics-based model prediction) was conducted and interpreted, in particular whether an external validation was performed; (3) reference standard — how the reference test (i.e., MGMT methylation status analysis) was conducted and interpreted; and (4) flow and timing — whether all patients had the index or reference test and were included in the final analysis. The first three domains were also assessed for possible concerns related to their applicability to the review question. The domains related to the risk of bias and to the applicability concerns were examined for each study and categorized as either low risk, high risk, or unclear. An overall assessment of the risk of bias and, separately, of the applicability concerns was also conducted based on the results of the corresponding domains in each study. If at least one domain had “high risk of bias”, then overall risk was categorized as “high”. If at least two domains had “unclear risk of bias”, then overall risk was categorized as “unclear”. The same criteria were used for overall applicability concerns. The same reviewers independently reviewed each study and any disagreement was resolved by consensus.

### Supplementary Results

The results of the QUADAS-2 assessment are illustrated in Supplementary Figure 1. Overall risk of bias was low in 10 studies, unclear in one, and high in 15. In particular, one study had high risk of bias in domain 1 (patient selection) because of the enrollment of patients with recurrent glioblastoma only [50]. Other 13 studies had high risk of bias in domain 2 (index test) because they did not perform an external validation [11, 14, 32, 34–36, 38–41, 46, 47, 53]. One work [42] had high risk of bias in domain 4 (flow and timing) because of the use of different methods for MGMT methylation analysis among patients in the training and validation sets and to the random selection of a small validation set of patients from a public dataset. Other studies had unclear risk of bias in domain 2 (index test), because it was not specified whether a pre-determined threshold/cut-off was used for the model predictions to classify positive results; and in domain 4 (flow and timing) an unclear risk of bias was identified because in some studies the reference standard was not available for all patients.

Overall, the majority of studies (25 out of 26) had low applicability concerns related to the present review question. One study [34] had high applicability concerns, because radiomic features were extracted only from perfusion dynamic susceptibility contrast MR images, while such process was done on conventional images (T1, T2, and/or FLAIR) in all the other studies. Regarding domain 3

(reference standard), we acknowledge that no international consensus on MGMT methylation method and threshold is recognized [55]. Nevertheless, we searched which method was utilized to assess MGMT methylation status: 20 studies mentioned a specific method whereas six did not. As for the threshold, only six studies reported a value to discriminate between positive and negative results [34, 41, 42, 47, 51, 52] and, therefore, these were classified as having low applicability concerns for domain 3; all the other 20 studies were classified as having unclear applicability concerns for domain 3.

**Supplementary Table 1.** Additional information of the studies included in this review.

| Study               | Glioma grades                                     | Other explored markers                                                  | Tumor compartment considered | Tumor compartments whose features were selected       | MRI sequences whose features were selected | Total number of features extracted | Methods used for feature selection                                                                                                                                                                                                                                                                                                                                                     | Methods used for classification                                                                                                                                                                                                                         |
|---------------------|---------------------------------------------------|-------------------------------------------------------------------------|------------------------------|-------------------------------------------------------|--------------------------------------------|------------------------------------|----------------------------------------------------------------------------------------------------------------------------------------------------------------------------------------------------------------------------------------------------------------------------------------------------------------------------------------------------------------------------------------|---------------------------------------------------------------------------------------------------------------------------------------------------------------------------------------------------------------------------------------------------------|
| Calabrese 2022 [32] | IV                                                | IDH, TERT, TP53, PTEN, ATRX, CDKN2A/B, EGFR, aneuploidy of ch7 and ch10 | CE, NEC, HYP                 | no mention                                            | no mention                                 | 5300                               | Three-step process with a 5-fold cross-validation approach:<br>1) Univariate feature selection with mutual information (1024 best correlated features were selected);<br>2) recursive feature elimination with a random forest classifier to rank the best features for each cross-validation fold<br>3) the 32 features with the best average rank across folds were finally selected | Random Forest, Convolutional Neural Network                                                                                                                                                                                                             |
| Chen 2022 [33]      | 65 GBM and 46 LGG                                 | -                                                                       | CE+NEC, CE+NEC+HYP           | no mention                                            | no mention                                 | 688                                | No feature selection                                                                                                                                                                                                                                                                                                                                                                   | Convolutional Neural Network (ResNet-18)                                                                                                                                                                                                                |
| Crisi 2020 [34]     | IV                                                | -                                                                       | CE+NEC                       | no compartments                                       | rCBV (4), rCBF (1)                         | 92                                 | Mann-Whitney test with Bonferroni correction                                                                                                                                                                                                                                                                                                                                           | Naive Bayes, Decision Trees, Multilayer Perceptron                                                                                                                                                                                                      |
| Do 2022 [35]        | IV                                                | -                                                                       | CE, NET, HYP                 | no mention                                            | all sequences (14)                         | 704                                | XGBoost and Genetic Algorithm                                                                                                                                                                                                                                                                                                                                                          | Random Forest, Extreme Gradient Boosting, Support Vector Machine                                                                                                                                                                                        |
| Hajianfar 2019 [36] | IV                                                | -                                                                       | whole tumor, CE, NEC, HYP    | whole tumor, edema, necrosis, active (enhanced tumor) | T1Gd, FLAIR                                | 8519                               | Different feature selection methods and their combinations:<br>(1) select K best;<br>(2) mutual information regression;<br>(3) select from model;<br>(4) select percentile;<br>(5) variance threshold                                                                                                                                                                                  | AdaBoost, Bagging Decision Tree, Naive Bayes, Decision Tree, Gaussian Naive Bayes, K-Nearest Neighbors, Logistic Regression, Multilayer Perceptron, Quadratic Discriminant Analysis, Random Forest, Stochastic Gradient Descent, Support Vector Machine |
| Haubold 2021 [37]   | 28 LGG; 187 HGG                                   | grade, ATRX, 1p19q, IDH                                                 | not specified                | no compartments                                       | not mentioned                              | 1562                               | Boruta                                                                                                                                                                                                                                                                                                                                                                                 | Extreme Gradient Boosting                                                                                                                                                                                                                               |
| Haubold 2020 [38]   | 1 grade I; 13 grade II; 7 grade III; 9 grade IV   | 1p19q, ATRX, IDH, grade                                                 | whole tumor                  | no compartments                                       | T1, T1Gd, DWI (b1000)                      | 19284                              | t-score; f-score (ANOVA); chi-square; LCSi; randomized logistic regression repeated 200 times                                                                                                                                                                                                                                                                                          | Random Forest, Support Vector Machine                                                                                                                                                                                                                   |
| He 2022 [39]        | 2 grade I; 26 grade II; 29 grade III; 24 grade IV | IDH, TERT, 1p/19q                                                       | HYP                          | HYP                                                   | T2, T1, DWI (b1000), T1Gd                  | 107                                | LASSO                                                                                                                                                                                                                                                                                                                                                                                  | Logistic Regression                                                                                                                                                                                                                                     |

|                     |                                       |                             |                           |                                                      |                                       |              |                                                                                                                             |                                                                                                                                                                                         |
|---------------------|---------------------------------------|-----------------------------|---------------------------|------------------------------------------------------|---------------------------------------|--------------|-----------------------------------------------------------------------------------------------------------------------------|-----------------------------------------------------------------------------------------------------------------------------------------------------------------------------------------|
| Huang 2021 [40]     | 14 LGG; 45 HGG                        | grade, IDH                  | whole tumor               | no compartments                                      | not mentioned                         | 369          | Univariate statistical tests, LASSO                                                                                         | Logistic Regression                                                                                                                                                                     |
| Huang 2021 [41]     | I-IV                                  | -                           | whole tumor               | no compartments                                      | T1, T1Gd, T2, FLAIR,                  | 396          | minimum redundancy maximum relevance; top five features most correlated with MGMT status were selected                      | Logistic Regression                                                                                                                                                                     |
| Jiang 2019 [42]     | II-III                                | -                           | CE+HYP                    | no compartments                                      | 3D-T1Gd (4); T2 (11)                  | 1702         | LASSO                                                                                                                       | AdaBoost, Random Forest, Support Vector Machine                                                                                                                                         |
| Kihira 2021 [43]    | 7 grade II; 12 grade III; 92 grade IV | IDH, EGFR, ATRX, PTEN, TP53 | whole tumor               | no compartments                                      | 3D-T1Gd (1); 3D-FLAIR (1)             | 368          | LASSO                                                                                                                       | Logistic Regression                                                                                                                                                                     |
| Kihira 2022 [44]    | 124 GBM and other 84 LGG              | IDH                         | whole tumor               | FLAIR                                                | whole tumor                           | 95           | No selection                                                                                                                | Multilayer Perceptron, Random Forest, Extreme Gradient Boosting, Support Vector Machine                                                                                                 |
| Korfiatis 2016 [11] | IV                                    | -                           | CE, NET                   | no mention                                           | T2 (7); T1Gd (4)                      | not reported | Ridge regression                                                                                                            | Random Forest, Support Vector Machine                                                                                                                                                   |
| Le 2020 [14]        | IV                                    | -                           | CE, NET, HYP              | CE, NET, HYP                                         | T1, T2, FLAIR                         | 704          | F-score; RFE                                                                                                                | K-Nearest Neighbors, Naïve Bayes, Random Forest, Extreme Gradient Boosting, Support Vector Machine                                                                                      |
| Li 2018 [12]        | IV                                    | -                           | NEC, edema, NET, CE       | core (2), edema (2), necrosis (1), enhanced area (1) | T1 (2), T2 (2), T1Gd (1), FLAIR (1)   | 1705         | Boruta; Mann-Whitney test with Benjamini-Hochberg correction and Spearman correlation coefficient for redundancy evaluation | Random Forest                                                                                                                                                                           |
| Lu 2020 [45]        | IV                                    | -                           | CE, NEC, CE+NEC           | CE (5), NEC (2), whole tumor (4)                     | T1Gd                                  | 333          | Boruta                                                                                                                      | K-Nearest Neighbors, Decision Tree, Random Forest, Gradient Boosting Tree, Support Vector Machine, Deep Learning algorithm (not otherwise specified)                                    |
| Pasquini 2021 [46]  | IV                                    | Ki-67, IDH, EGFR            | CE, NEC, HYP              | CE                                                   | FLAIR (top 15)                        | 1871         | Boruta                                                                                                                      | AdaBoost, Extreme Gradient Boosting, Gradient Boosting Tree, Decision Tree, Random Forest, Logistic Regression, K-Nearest Neighbors, ensemble stacking, ensemble stacking with AdaBoost |
| Pease 2022 [53]     | IV                                    | EGFR                        | CE, NEC, HYP, whole tumor | not mentioned                                        | T1Gd and FLAIR (100)                  | 4880         | Maximum Relevance Minimum Redundancy                                                                                        | Support Vector Machine                                                                                                                                                                  |
| Sasaki 2019 [47]    | IV                                    | -                           | CE+NEC, HYP               | CE+NEC (1), HYP (1)                                  | T1Gd (2)                              | 489          | LASSO                                                                                                                       | Logistic Regression                                                                                                                                                                     |
| Shboul 2020 [48]    | II-III                                | IDH, 1p/19q, ATRX, TERT     | CE, HYP, NET              | not specified for the radiomic model                 | not specified for the radiomics model | 680          | Recursive feature selection                                                                                                 | Extreme Gradient Boosting                                                                                                                                                               |

|                      |       |                    |                        |                         |                        |      |                                                                                                                                                                         |                                                                  |
|----------------------|-------|--------------------|------------------------|-------------------------|------------------------|------|-------------------------------------------------------------------------------------------------------------------------------------------------------------------------|------------------------------------------------------------------|
| Sohn<br>2021 [15]    | IV    | IDH, ATRX,<br>EGFR | CE, HYP                | CE                      | T2 (1)                 | 660  | LASSO                                                                                                                                                                   | Support Vector Machine                                           |
| Verduin<br>2021 [49] | IV    | IDH, EGFR          | CE,<br>tumor+edema     | no mention              | T2 (3)                 | 1197 | Spearman correlation coefficient, lower AUC<br>in univariate ROC analysis; top 20 features<br>ranked by importance as estimated by<br>Random Forest repeated 1000 times | Extreme Gradient Boosting, Random Forest,<br>Logistic Regression |
| Vils<br>2021 [50]    | IV    | -                  | CE+NEC,<br>peritumoral | CE+NEC                  | T1Gd (2)               | 180  | PCA and univariate logistic regression;<br>backward selection based on AIC                                                                                              | Logistic Regression                                              |
| Wei<br>2019 [51]     | II-IV | -                  | tumor, edema           | edema (4), tumor<br>(6) | T1Gd (3),<br>FLAIR (7) | 3051 | ICC, CCC, dynamic range analysis, Mann-<br>Whitney without correction; minimum<br>redundancy maximum relevance score;<br>backward selection with BIC                    | Logistic Regression                                              |
| Xi<br>2018 [52]      | IV    | -                  | CE+NEC+NE<br>T         | only one<br>compartment | T1 (4),<br>T2 (19)     | 1665 | LASSO                                                                                                                                                                   | Support Vector Machine                                           |

Abbreviations: CE = contrast-enhanced tumor; NEC = necrosis; NET = non-enhancing tumor (excluding edema on T2/FLAIR); HYP = non-enhancing tumor (including edema on T2/FLAIR)

**Supplementary Table 2.** Evaluation of the TRIPOD checklist items in the 26 included studies.

| Study               | Title and abstract |   | Background and objectives |    | Source of data |    | Participants |    |    | Outcome |    | Predictors |    | Sample size | Missing data | Statistical analysis methods |     |     |     |     | Risk groups | Development vs validation |
|---------------------|--------------------|---|---------------------------|----|----------------|----|--------------|----|----|---------|----|------------|----|-------------|--------------|------------------------------|-----|-----|-----|-----|-------------|---------------------------|
|                     | 1                  | 2 | 3a                        | 3b | 4a             | 4b | 5a           | 5b | 5c | 6a      | 6b | 7a         | 7b | 8           | 9            | 10a                          | 10b | 10c | 10d | 10e | 11          | 12                        |
| Calabrese 2022 [32] | 0                  | 0 | 1                         | 1  | 1              | 1  | 1            | 1  | NA | 1       | 1  | 1          | 1  | 0           | 1            | 1                            | 0   | NA  | 0   | NA  | NA          | NA                        |
| Chen 2022 [33]      | 0                  | 0 | 1                         | 0  | 1              | 1  | 1            | 1  | NA | 0       | 1  | 1          | 0  | 0           | 1            | 1                            | 0   | 0   | 0   | NA  | NA          | 1                         |
| Crisi 2020 [34]     | 0                  | 0 | 1                         | 1  | 1              | 1  | 1            | 1  | NA | 1       | 1  | 1          | 1  | 0           | 0            | 1                            | 0   | NA  | 0   | NA  | NA          | NA                        |
| Do 2022 [35]        | 0                  | 0 | 1                         | 1  | 1              | 1  | 1            | 1  | NA | 0       | 0  | 0          | 1  | 1           | 1            | 1                            | 0   | NA  | 0   | NA  | NA          | NA                        |
| Hajianfar 2019 [36] | 0                  | 0 | 1                         | 1  | 1              | 1  | 1            | 1  | NA | 1       | 1  | 1          | 1  | 1           | 1            | 1                            | 0   | NA  | 0   | NA  | NA          | NA                        |
| Haubold 2021 [37]   | 0                  | 0 | 1                         | 1  | 1              | 0  | 0            | 1  | NA | 0       | 1  | 1          | 1  | 0           | 0            | 1                            | 0   | NA  | 0   | NA  | NA          | NA                        |
| Haubold 2020 [38]   | 0                  | 0 | 1                         | 0  | 1              | 0  | 1            | 1  | NA | 0       | 1  | 1          | 0  | 0           | 1            | 1                            | 0   | 0   | 0   | NA  | NA          | 1                         |
| He 2022 [39]        | 0                  | 0 | 1                         | 1  | 1              | 1  | 0            | 1  | NA | 1       | 1  | 1          | 0  | 0           | 1            | 1                            | 0   | NA  | 0   | NA  | NA          | NA                        |
| Huang 2021 [40]     | 0                  | 0 | 1                         | 1  | 1              | 1  | 1            | 1  | NA | 1       | 1  | 1          | 1  | 0           | 0            | 1                            | 0   | NA  | 0   | NA  | NA          | NA                        |
| Huang 2021 [41]     | 0                  | 0 | 1                         | 1  | 1              | 1  | 1            | 1  | NA | 1       | 1  | 1          | 0  | 0           | 0            | 1                            | 0   | NA  | 1   | NA  | NA          | NA                        |
| Jiang 2019 [42]     | 0                  | 0 | 1                         | 0  | 1              | 1  | 1            | 1  | NA | 1       | 1  | 1          | 1  | 0           | 1            | 1                            | 0   | 0   | 0   | NA  | NA          | 0                         |
| Kihira 2021 [43]    | 0                  | 0 | 1                         | 0  | 1              | 1  | 0            | 1  | NA | 1       | 1  | 1          | 1  | 0           | 1            | 1                            | 0   | NA  | 0   | NA  | NA          | NA                        |
| Kihira 2022 [44]    | 0                  | 0 | 1                         | 1  | 1              | 0  | 0            | 0  | NA | 1       | 1  | 1          | 0  | 0           | 0            | 1                            | 0   | 0   | 0   | NA  | NA          | 0                         |
| Korfiatis 2016 [11] | 0                  | 0 | 0                         | 1  | 1              | 1  | 1            | 1  | NA | 0       | 1  | 1          | 1  | 0           | 1            | 1                            | 1   | NA  | 0   | NA  | NA          | NA                        |
| Le 2020 [14]        | 0                  | 0 | 1                         | 1  | 1              | 1  | 0            | 1  | NA | 1       | 1  | 1          | 1  | 1           | 1            | 1                            | 0   | NA  | 0   | NA  | NA          | NA                        |
| Li 2018 [12]        | 0                  | 0 | 1                         | 0  | 1              | 1  | 1            | 1  | NA | 1       | 1  | 0          | 0  | 0           | 0            | 1                            | 1   | 0   | 0   | NA  | NA          | 0                         |
| Lu 2020 [45]        | 0                  | 0 | 1                         | 0  | 1              | 1  | 1            | 1  | NA | 1       | 1  | 1          | 1  | 0           | 1            | 1                            | 0   | 0   | 0   | NA  | 1           | 0                         |
| Pasquini 2021 [46]  | 0                  | 0 | 1                         | 1  | 1              | 1  | 1            | 1  | NA | 1       | 1  | 1          | 1  | 0           | 0            | 1                            | 0   | NA  | 0   | NA  | NA          | NA                        |
| Pease 2022 [53]     | 0                  | 0 | 1                         | 0  | 1              | 1  | 1            | 1  | NA | 1       | 1  | 1          | 1  | 1           | 1            | 1                            | 0   | 0   | 0   | NA  | NA          | 1                         |
| Sasaki 2019 [47]    | 0                  | 0 | 0                         | 0  | 1              | 0  | 1            | 1  | NA | 1       | 1  | 1          | 0  | 0           | 0            | 1                            | 0   | NA  | 0   | NA  | 0           | NA                        |

|                   |   |   |   |   |   |   |   |   |    |   |   |   |   |   |   |   |   |   |   |    |    |   |
|-------------------|---|---|---|---|---|---|---|---|----|---|---|---|---|---|---|---|---|---|---|----|----|---|
| Shboul 2020 [48]  | 0 | 0 | 1 | 0 | 0 | 0 | 0 | 0 | NA | 1 | 1 | 1 | 1 | 1 | 0 | 1 | 0 | 0 | 0 | NA | NA | 0 |
| Sohn 2021 [15]    | 0 | 0 | 1 | 0 | 1 | 1 | 0 | 1 | NA | 1 | 1 | 1 | 1 | 0 | 1 | 1 | 0 | 0 | 0 | NA | NA | 1 |
| Verduin 2021 [49] | 0 | 0 | 1 | 1 | 1 | 1 | 1 | 1 | NA | 1 | 1 | 1 | 0 | 0 | 1 | 1 | 0 | 1 | 0 | NA | 1  | 1 |
| Vils 2021 [50]    | 0 | 0 | 1 | 0 | 1 | 0 | 1 | 1 | NA | 0 | 1 | 0 | 1 | 1 | 0 | 1 | 0 | 0 | 0 | NA | 0  | 1 |
| Wei 2019 [51]     | 0 | 0 | 1 | 0 | 1 | 1 | 1 | 1 | NA | 1 | 1 | 0 | 0 | 1 | 0 | 1 | 0 | 0 | 0 | NA | 1  | 1 |
| Xi 2018 [52]      | 0 | 0 | 1 | 0 | 1 | 0 | 0 | 1 | NA | 1 | 1 | 1 | 1 | 0 | 0 | 1 | 0 | 0 | 0 | NA | NA | 0 |

**Supplementary Table 2 (continued).**

| Study               | Participants |     |     | Model development |     | Model specification |     | Model performance | Model updating | Limitations | Interpretation |     | Implications | Suppl. info | Funding | TOTAL |
|---------------------|--------------|-----|-----|-------------------|-----|---------------------|-----|-------------------|----------------|-------------|----------------|-----|--------------|-------------|---------|-------|
|                     | 13a          | 13b | 13c | 14a               | 14b | 15a                 | 15b | 16                | 17             | 18          | 19a            | 19b | 20           | 21          | 22      |       |
| Calabrese 2022 [32] | 0            | 1   | NA  | 1                 | NA  | 0                   | 0   | 0                 | NA             | 1           | NA             | 1   | 0            | 1           | 1       | 18    |
| Chen 2022 [33]      | 0            | 0   | 0   | 0                 | NA  | 0                   | 0   | 0                 | NA             | 1           | 1              | 1   | 1            | 0           | 1       | 15    |
| Crisi 2020 [34]     | 1            | 0   | NA  | 1                 | NA  | 0                   | 0   | 0                 | NA             | 1           | NA             | 1   | 1            | 0           | 1       | 17    |
| Do 2022 [35]        | 0            | 0   | NA  | 1                 | NA  | 0                   | 0   | 0                 | NA             | 1           | NA             | 1   | 1            | 1           | 0       | 15    |
| Hajianfar 2019 [36] | 0            | 0   | NA  | 1                 | NA  | 0                   | 0   | 0                 | NA             | 1           | NA             | 1   | 1            | 0           | 0       | 17    |
| Haubold 2021 [37]   | 0            | 0   | NA  | 1                 | NA  | 0                   | 0   | 0                 | NA             | 1           | NA             | 1   | 0            | 0           | 1       | 12    |
| Haubold 2020 [38]   | 0            | 0   | 0   | 1                 | NA  | 0                   | 0   | 0                 | NA             | 1           | 1              | 1   | 1            | 0           | 1       | 15    |
| He 2022 [39]        | 1            | 1   | NA  | 1                 | NA  | 0                   | 0   | 0                 | NA             | 1           | NA             | 1   | 1            | 0           | 0       | 16    |
| Huang 2021 [40]     | 0            | 0   | NA  | 1                 | NA  | 1                   | 1   | 1                 | NA             | 1           | NA             | 1   | 1            | 0           | 0       | 18    |
| Huang 2021 [41]     | 0            | 0   | NA  | 1                 | NA  | 0                   | 0   | 1                 | NA             | 1           | NA             | 1   | 0            | 0           | 0       | 15    |
| Jiang 2019 [42]     | 1            | 0   | 0   | 1                 | NA  | 0                   | 0   | 0                 | NA             | 1           | 1              | 1   | 1            | 0           | 1       | 18    |
| Kihira 2021 [43]    | 1            | 1   | NA  | 1                 | NA  | 0                   | 0   | 0                 | NA             | 1           | NA             | 1   | 0            | 0           | 0       | 15    |
| Kihira 2022 [44]    | 0            | 0   | 0   | 0                 | NA  | 0                   | 0   | 0                 | NA             | 1           | 1              | 1   | 1            | 0           | 1       | 12    |

|                     |   |   |    |   |    |   |   |   |    |   |    |   |   |   |   |    |
|---------------------|---|---|----|---|----|---|---|---|----|---|----|---|---|---|---|----|
| Korfiatis 2016 [11] | 1 | 0 | NA | 1 | NA | 0 | 0 | 0 | NA | 1 | NA | 1 | 1 | 0 | 0 | 16 |
| Le 2020 [14]        | 0 | 0 | NA | 1 | NA | 0 | 0 | 0 | NA | 1 | NA | 1 | 0 | 0 | 1 | 16 |
| Li 2018 [12]        | 0 | 0 | 0  | 1 | NA | 0 | 0 | 0 | NA | 1 | 1  | 1 | 1 | 0 | 0 | 14 |
| Lu 2020 [45]        | 1 | 0 | 1  | 1 | NA | 0 | 0 | 0 | NA | 0 | 0  | 1 | 1 | 0 | 0 | 17 |
| Pasquini 2021 [46]  | 0 | 0 | NA | 1 | NA | 0 | 0 | 0 | NA | 1 | NA | 1 | 0 | 0 | 1 | 15 |
| Pease 2022 [53]     | 0 | 1 | 0  | 1 | NA | 0 | 0 | 0 | NA | 1 | 1  | 1 | 1 | 0 | 0 | 19 |
| Sasaki 2019 [47]    | 0 | 0 | NA | 0 | NA | 0 | 0 | 0 | NA | 1 | NA | 1 | 1 | 1 | 0 | 11 |
| Shboul 2020 [48]    | 0 | 0 | 0  | 0 | NA | 0 | 0 | 0 | NA | 0 | 1  | 1 | 1 | 0 | 0 | 10 |
| Sohn 2021 [15]      | 0 | 1 | 0  | 1 | NA | 0 | 0 | 0 | NA | 1 | 1  | 1 | 0 | 0 | 0 | 16 |
| Verduin 2021 [49]   | 0 | 1 | 1  | 1 | 0  | 1 | 0 | 0 | NA | 1 | 1  | 1 | 1 | 0 | 1 | 23 |
| Vils 2021 [50]      | 0 | 0 | 0  | 1 | NA | 0 | 0 | 0 | NA | 1 | 1  | 1 | 1 | 0 | 0 | 14 |
| Wei 2019 [51]       | 1 | 0 | 0  | 1 | NA | 0 | 0 | 0 | NA | 1 | 1  | 1 | 1 | 0 | 0 | 17 |
| Xi 2018 [52]        | 0 | 0 | 0  | 1 | NA | 0 | 0 | 0 | NA | 0 | 1  | 1 | 1 | 0 | 0 | 12 |



**Supplementary Figure 1.** Evolution of studies' RQS (top panel) and TRIPOD scores (bottom panel) grouped per year of publication. Median, maximum and minimum scores are represented; no remarkable variations among years could be observed.

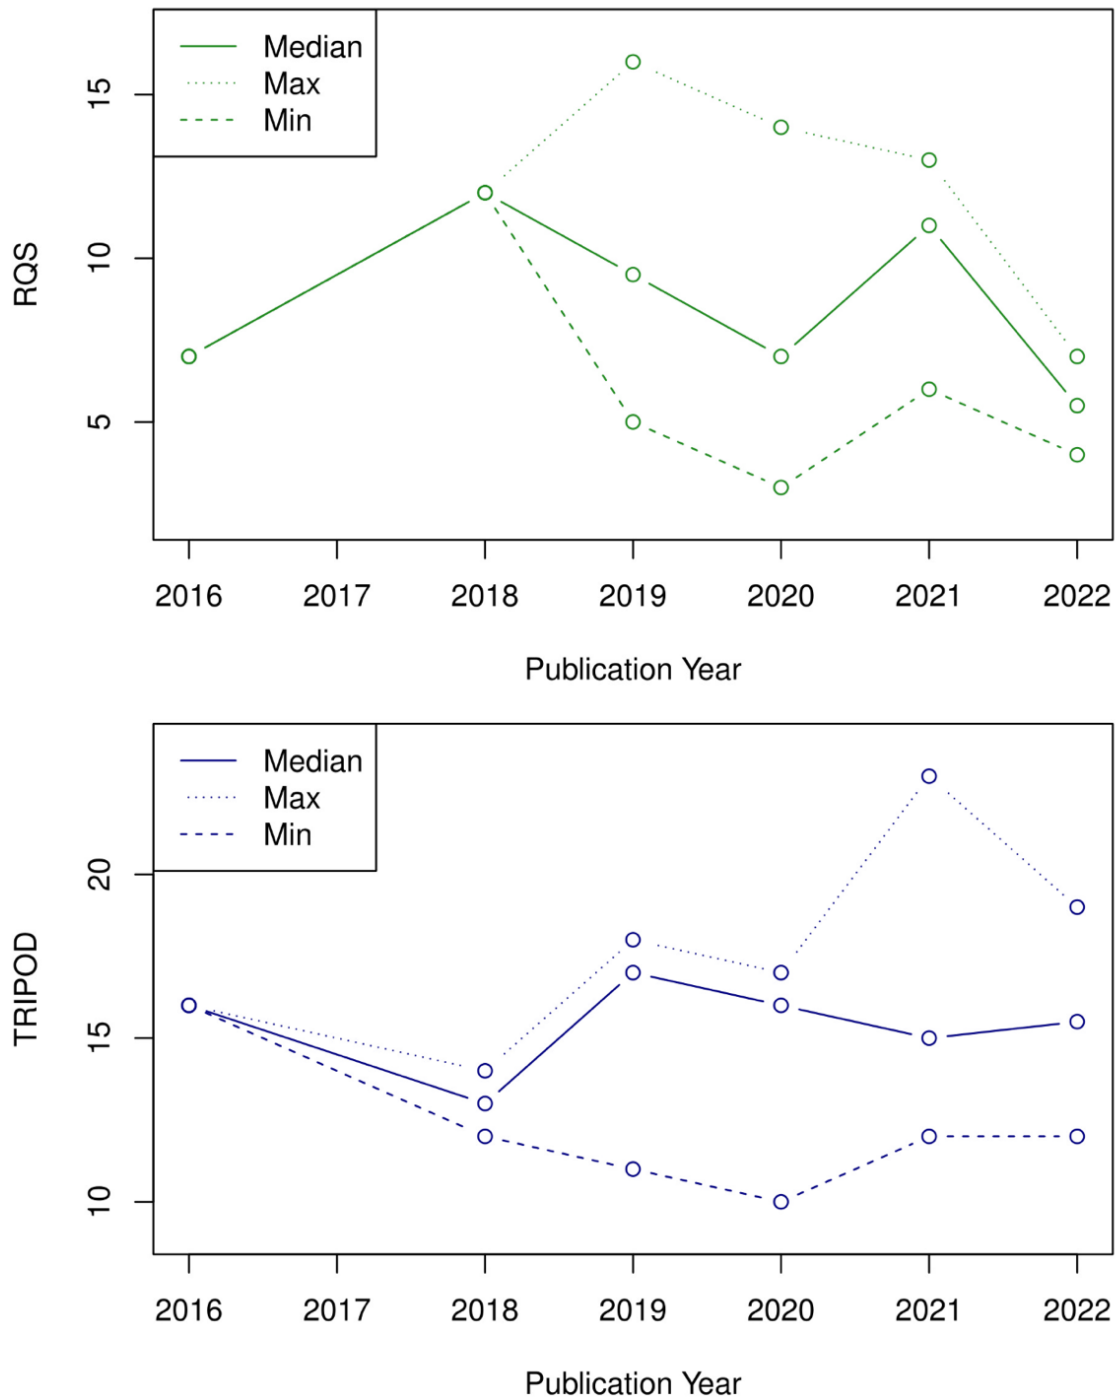

**Supplementary Figure 2.** Summary of the evaluation of the risk of bias and the applicability concerns in the 26 included studies.

| Study               | Risk of bias domains |    |    |    |         | Applicability concerns domains |    |    |         |
|---------------------|----------------------|----|----|----|---------|--------------------------------|----|----|---------|
|                     | D1                   | D2 | D3 | D4 | Overall | D1                             | D2 | D3 | Overall |
| Calabrese 2022 [32] | +                    | X  | +  | -  | X       | +                              | +  | -  | +       |
| Chen 2022 [33]      | +                    | +  | +  | +  | +       | +                              | +  | -  | +       |
| Crisi 2020 [34]     | -                    | X  | +  | +  | X       | X                              | +  | +  | X       |
| Do 2022 [35]        | +                    | X  | +  | -  | X       | +                              | +  | -  | +       |
| Hajianfar 2019 [36] | +                    | X  | +  | +  | X       | +                              | +  | -  | +       |
| Haubold 2021 [37]   | -                    | -  | +  | -  | -       | +                              | +  | -  | +       |
| Haubold 2020 [38]   | +                    | X  | +  | -  | X       | +                              | +  | -  | +       |
| He 2022 [39]        | +                    | X  | +  | +  | X       | +                              | +  | -  | +       |
| Huang 2021 [40]     | +                    | X  | +  | -  | X       | +                              | +  | -  | +       |
| Huang 2021 [41]     | +                    | X  | +  | +  | X       | +                              | +  | +  | +       |
| Jiang 2019 [42]     | +                    | +  | +  | X  | X       | +                              | +  | +  | +       |
| Kihira 2021 [43]    | +                    | +  | +  | -  | +       | +                              | +  | -  | +       |
| Kihira 2022 [44]    | +                    | +  | +  | +  | +       | +                              | +  | -  | +       |
| Korfiatis 2016 [11] | +                    | X  | +  | -  | X       | +                              | +  | -  | +       |
| Le 2020 [14]        | +                    | X  | +  | +  | X       | +                              | +  | -  | +       |
| Li 2018 [12]        | +                    | -  | +  | +  | +       | +                              | +  | -  | +       |
| Lu 2020 [45]        | +                    | -  | +  | +  | +       | +                              | +  | -  | +       |
| Pasquini 2021 [46]  | +                    | X  | +  | -  | X       | +                              | +  | -  | +       |
| Pease 2022 [53]     | +                    | X  | +  | -  | X       | +                              | +  | -  | +       |
| Sasaki 2019 [47]    | +                    | X  | +  | +  | X       | +                              | +  | +  | +       |
| Shboul 2020 [48]    | +                    | -  | +  | +  | +       | +                              | +  | -  | +       |
| Sohn 2021 [15]      | +                    | +  | +  | +  | +       | +                              | +  | -  | +       |
| Verduin 2021 [49]   | +                    | -  | +  | +  | +       | +                              | +  | -  | +       |
| Vils 2021 [50]      | X                    | -  | +  | -  | X       | +                              | +  | -  | +       |
| Wei 2019 [51]       | -                    | +  | +  | +  | +       | +                              | +  | +  | +       |
| Xi 2018 [52]        | +                    | -  | +  | +  | +       | +                              | +  | +  | +       |

Domains:  
 D1: Patient selection.  
 D2: Index test.  
 D3: Reference standard.  
 D4: Flow & timing.

Judgement  
 X High  
 - Some concerns  
 + Low

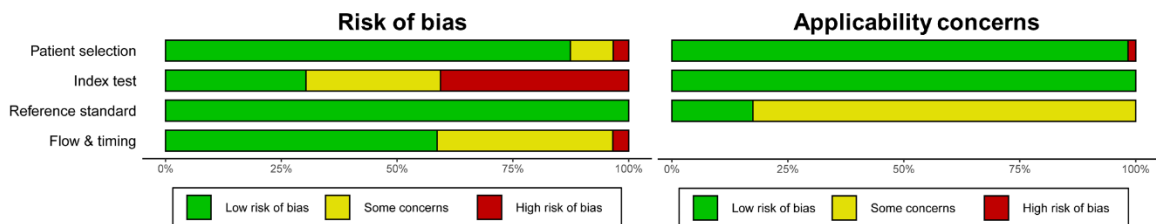

**Supplementary Figure 3.** Sensitivity analysis of the results of the meta-analysis. Each line illustrates and reports the pooled area under the curve (indicated as Effect Size in the plot, with 95% confidence interval and the heterogeneity statistic  $I^2$ ) estimated by omitting one specific study at the time from the random-effect model. No study had a significant influence on the model results.

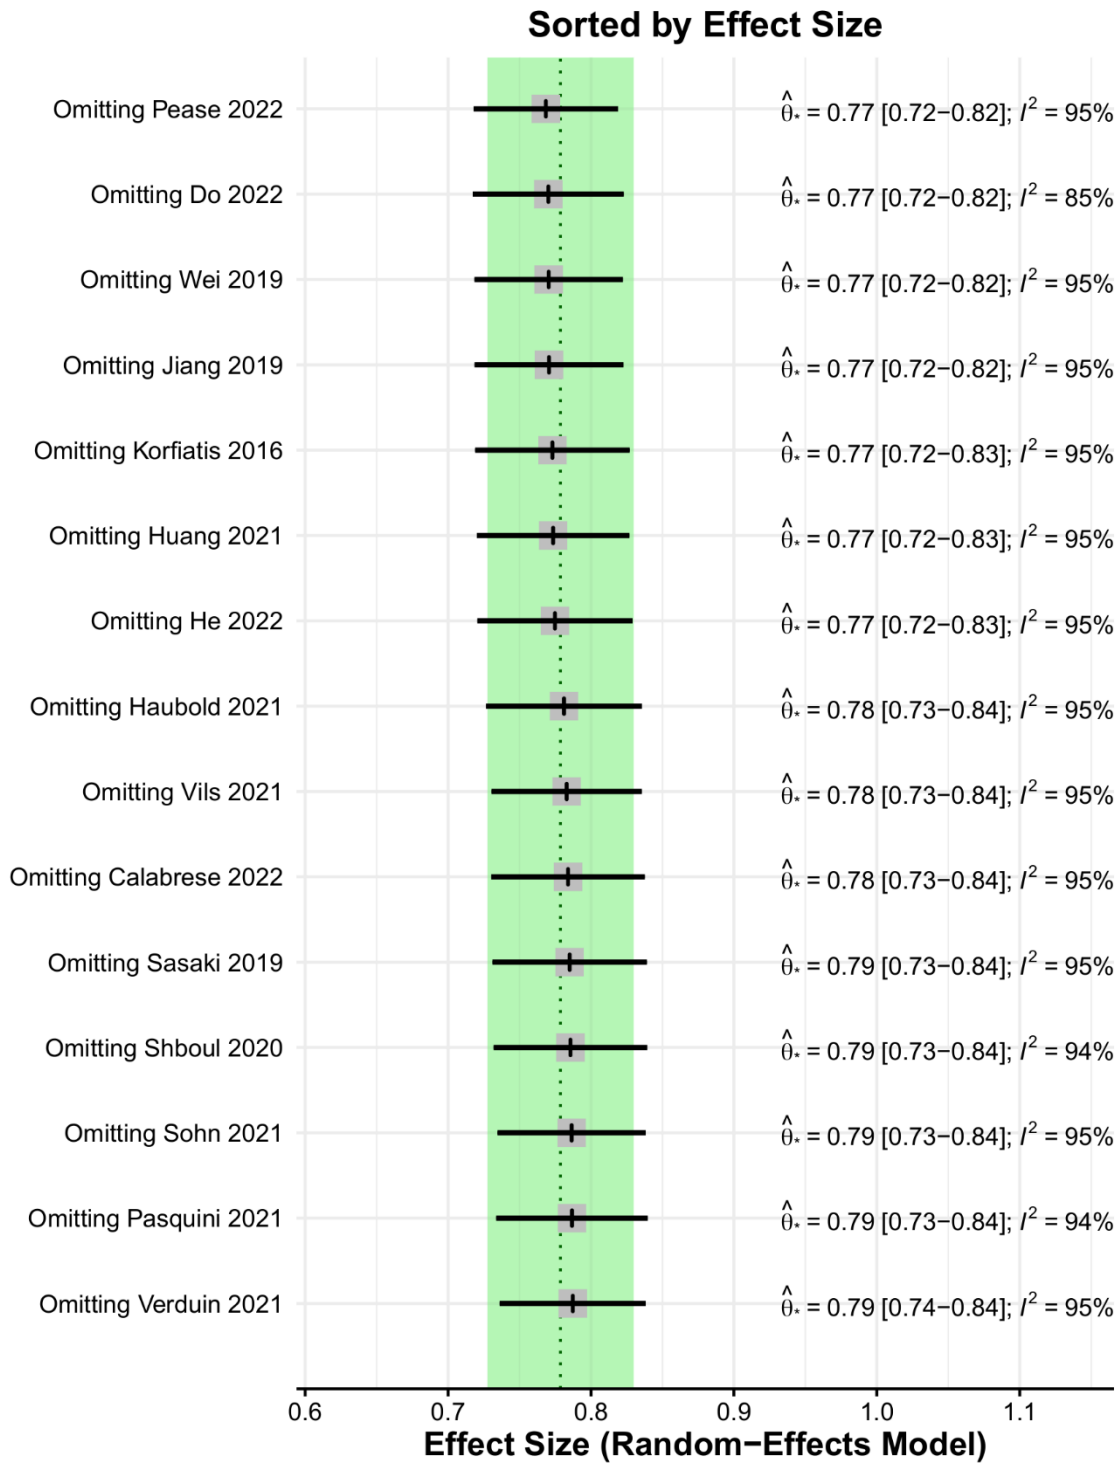

**Supplementary Figure 4.** Funnel plot to investigate publication bias. No evident asymmetry can be observed, suggesting the absence of publication bias.

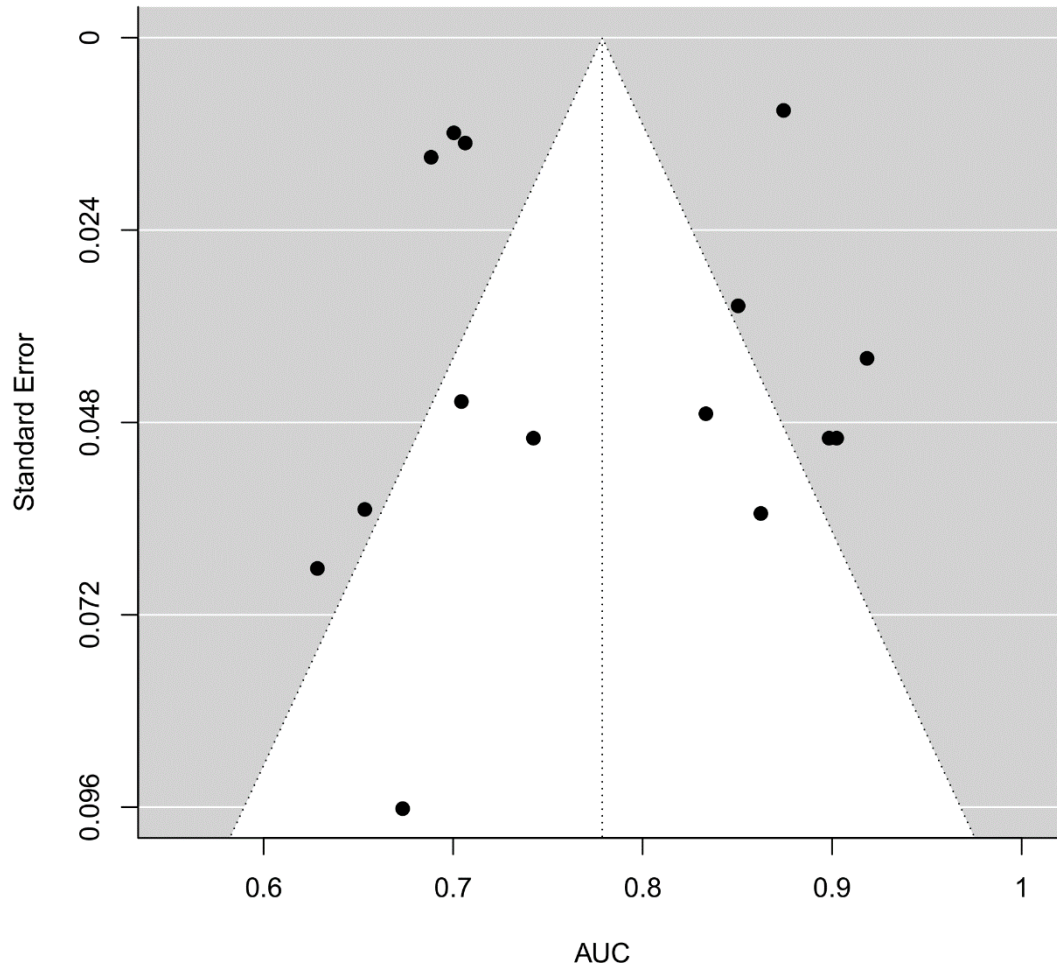

Abbreviation: AUC = area under the curve.
